# Supplementary material for: A Strategy for Discovery and Verification of Candidate Biomarkers in Cerebrospinal Fluid of Preclinical Alzheimer’s Disease
Source: Front Mol Neurosci. 2019 Jan 7;11:483. doi: 10.3389/fnmol.2018.00483 (PMC6330998; doi:10.3389/fnmol.2018.00483)
Supplement: Supplementary file 2 [file Data_Sheet_2.xlsx]

## Sheet: A_Female
Majority protein IDs	Protein names	Gene names	Peptides	Unique peptides	Sequence coverage [%]	Mol. weight [kDa]	Ratio of Female Preclinical AD/Healthy control	P-value
P07333	Macrophage colony-stimulating factor 1 receptor	CSF1R	11	11	11.3	107.98	0.561874	1.72026e-07
P02649	Apolipoprotein E	APOE	32	32	78.2	36.154	1.73851	7.96204e-06
P08603	Complement factor H	CFH	64	60	62.6	139.09	1.12614	2.34797e-05
O15394	Neural cell adhesion molecule 2	NCAM2	24	24	34.2	93.045	0.5534	6.87394e-05
P06727	Apolipoprotein A-IV	APOA4	43	41	73	45.398	1.26549	0.0001533
P02751	Fibronectin;Anastellin;Ugl-Y1;Ugl-Y2;Ugl-Y3	FN1	33	33	21.1	262.62	1.46852	0.000170218
Q92823	Neuronal cell adhesion molecule	NRCAM	41	41	42.3	143.89	0.810956	0.000367551
Q9UHG2	ProSAAS;KEP;Big SAAS;Little SAAS;Big PEN-LEN;PEN;Little LEN;Big LEN	PCSK1N	11	11	65.4	27.372	1.28699	0.000472049
P05060	Secretogranin-1;PE-11;GAWK peptide;CCB peptide	CHGB	59	59	62	78.275	1.56662	0.00049019
Q9P121	Neurotrimin	NTM	16	13	48.8	37.971	0.709659	0.000553706
Q06481	Amyloid-like protein 2	APLP2	32	30	42.6	86.955	1.90322	0.000591109
P01033	Metalloproteinase inhibitor 1	TIMP1	8	8	55.6	23.171	1.13891	0.000737614
P10909	Clusterin;Clusterin beta chain;Clusterin alpha chain	CLU	24	24	41.2	52.494	1.24224	0.000864741
Q92859	Neogenin	NEO1	25	25	24.2	160.01	0.722768	0.000926704
Q9UMF0	Intercellular adhesion molecule 5	ICAM5	15	15	24.4	97.115	1.32309	0.00108711
Q08629	Testican-1	SPOCK1	16	15	50.8	49.124	1.75841	0.00162416
P00748	Coagulation factor XII;Coagulation factor XIIa heavy chain;Beta-factor XIIa part 1;Coagulation factor XIIa light chain	F12	16	16	35.9	67.791	0.64057	0.00184758
P01344	Insulin-like growth factor II;Insulin-like growth factor II;Insulin-like growth factor II Ala-25 Del;Preptin	IGF2	6	6	26.7	20.14	1.44914	0.00244244
P04216	Thy-1 membrane glycoprotein	THY1	5	5	35.4	17.935	1.61876	0.00245045
P00736	Complement C1r subcomponent;Complement C1r subcomponent heavy chain;Complement C1r subcomponent light chain	C1R	33	32	55.9	80.118	1.21218	0.00280287
Q15904	V-type proton ATPase subunit S1	ATP6AP1	7	7	18.5	52.025	1.72812	0.00334206
Q9NQ79	Cartilage acidic protein 1	CRTAC1	29	29	52.2	71.42	1.59943	0.00344398
Q99574	Neuroserpin	SERPINI1	17	17	43.2	46.426	0.52075	0.0035087
O43505	Beta-1,4-glucuronyltransferase 1	B4GAT1	25	25	62.2	47.119	1.32491	0.003645
Q13740	CD166 antigen	ALCAM	21	21	43.9	65.102	0.536913	0.00396747
P08637	Low affinity immunoglobulin gamma Fc region receptor III-A	FCGR3A	5	5	20.9	29.089	0.640669	0.00427763
P17174	Aspartate aminotransferase, cytoplasmic	GOT1	18	18	61.3	46.247	0.305642	0.00441767
P00450	Ceruloplasmin	CP	56	56	63.8	122.2	0.803254	0.00452584
O94985	Calsyntenin-1;Soluble Alc-alpha;CTF1-alpha	CLSTN1	44	44	45.7	109.79	1.24017	0.00497005
P01019	Angiotensinogen;Angiotensin-1;Angiotensin-2;Angiotensin-3;Angiotensin-4;Angiotensin 1-9;Angiotensin 1-7;Angiotensin 1-5;Angiotensin 1-4	AGT	23	23	50.1	53.154	0.682476	0.00515864
P07711	Cathepsin L1;Cathepsin L1 heavy chain;Cathepsin L1 light chain	CTSL	13	13	42.3	37.564	0.890919	0.00553039
Q13449	Limbic system-associated membrane protein	LSAMP	14	14	41.4	37.393	0.873331	0.00576018
Q8NFZ8	Cell adhesion molecule 4	CADM4	10	10	40.2	42.785	0.636106	0.00602776
P05067	Amyloid beta A4 protein;N-APP;Soluble APP-alpha;Soluble APP-beta;C99;Beta-amyloid protein 42;Beta-amyloid protein 40;C83;P3(42);P3(40);C80;Gamma-secretase C-terminal fragment 59;Gamma-secretase C-terminal fragment 57;Gamma-secretase C-terminal fragment 50;C31	APP	35	33	42.7	86.942	1.63907	0.00608614
P11362	Fibroblast growth factor receptor 1	FGFR1	7	7	9.4	91.867	1.22849	0.0065525
Q8N126	Cell adhesion molecule 3	CADM3	13	13	38.2	43.299	1.26569	0.00708408
P07357	Complement component C8 alpha chain	C8A	16	16	42.1	65.163	0.73235	0.00716251
P40189	Interleukin-6 receptor subunit beta	IL6ST	14	14	22.1	103.54	1.26077	0.00716922
P01011	Alpha-1-antichymotrypsin;Alpha-1-antichymotrypsin His-Pro-less	SERPINA3	23	23	52	47.65	0.357292	0.00740105
P04156	Major prion protein	PRNP	7	7	30.4	27.661	1.15962	0.00788407
Q8TAG5	V-set and transmembrane domain-containing protein 2A	VSTM2A	4	4	25.8	25.833	0.677856	0.0094009
P00734	Prothrombin;Activation peptide fragment 1;Activation peptide fragment 2;Thrombin light chain;Thrombin heavy chain	F2	36	36	56.1	70.036	1.56021	0.00944249
P36955	Pigment epithelium-derived factor	SERPINF1	25	25	65.8	46.312	0.454835	0.0103249
P29622	Kallistatin	SERPINA4	21	21	53.9	48.541	0.488837	0.0110154
P78324;Q5TFQ8	Tyrosine-protein phosphatase non-receptor type substrate 1;Signal-regulatory protein beta-1 isoform 3	SIRPA;SIRPB1	17	17	42.5	54.966	0.360384	0.0113359
Q12805	EGF-containing fibulin-like extracellular matrix protein 1	EFEMP1	18	18	43.4	54.64	1.37619	0.0115473
P08697	Alpha-2-antiplasmin	SERPINF2	16	15	51.5	54.565	0.586391	0.0128399
Q9UBP4	Dickkopf-related protein 3	DKK3	19	19	60.9	38.39	1.7239	0.0142524
Q9Y4C0	Neurexin-3	NRXN3	43	31	32.1	180.6	1.19631	0.015518
P13521	Secretogranin-2;Secretoneurin;Manserin	SCG2	23	23	44.1	70.94	1.39322	0.0162837
P02750	Leucine-rich alpha-2-glycoprotein	LRG1	12	12	49.9	38.177	0.224	0.0164483
P0C0L5	Complement C4-B;Complement C4 beta chain;Complement C4-B alpha chain;C4a anaphylatoxin;C4b-B;C4d-B;Complement C4 gamma chain	C4B	84	4	56.1	192.75	0.62768	0.0168162
P02766	Transthyretin	TTR	16	16	77.6	15.887	0.155847	0.01705
P06681	Complement C2;Complement C2b fragment;Complement C2a fragment	C2	27	27	48.5	83.267	0.85205	0.0171034
P16870	Carboxypeptidase E	CPE	22	22	52.9	53.15	1.22857	0.0174267
Q01459	Di-N-acetylchitobiase	CTBS	11	11	36.1	43.759	0.815195	0.0185062
Q14624	Inter-alpha-trypsin inhibitor heavy chain H4;70 kDa inter-alpha-trypsin inhibitor heavy chain H4;35 kDa inter-alpha-trypsin inhibitor heavy chain H4	ITIH4	32	32	41.1	103.36	0.423456	0.0186137
P55058	Phospholipid transfer protein	PLTP	9	9	26.4	54.739	0.865071	0.0187501
O00533	Neural cell adhesion molecule L1-like protein;Processed neural cell adhesion molecule L1-like protein	CHL1	50	50	43.3	135.07	0.757682	0.0192367
P36222	Chitinase-3-like protein 1	CHI3L1	17	17	51.4	42.625	0.523109	0.0196118
P02765	Alpha-2-HS-glycoprotein;Alpha-2-HS-glycoprotein chain A;Alpha-2-HS-glycoprotein chain B	AHSG	7	7	33	39.324	0.37128	0.0204335
O00391	Sulfhydryl oxidase 1	QSOX1	17	17	29.6	82.577	0.73857	0.0213776
Q15223	Nectin-1	PVRL1	8	8	24.4	57.157	0.703312	0.0218293
P20774	Mimecan	OGN	20	20	48.7	33.922	1.45355	0.0230975
Q96GW7	Brevican core protein	BCAN	28	28	46.2	99.117	1.18208	0.0232437
Q9NT99	Leucine-rich repeat-containing protein 4B	LRRC4B	15	14	25.5	76.433	1.19354	0.023637
Q9Y5Y7	Lymphatic vessel endothelial hyaluronic acid receptor 1	LYVE1	6	6	20.5	35.213	1.29698	0.0238593
Q02818	Nucleobindin-1	NUCB1	26	26	63.3	53.879	1.11695	0.025678
Q7Z3B1	Neuronal growth regulator 1	NEGR1	15	15	47.5	38.719	0.807232	0.0275122
O00584	Ribonuclease T2	RNASET2	11	11	50.8	29.48	0.682117	0.0296575
Q16620	BDNF/NT-3 growth factors receptor	NTRK2	6	6	12.4	91.998	1.32218	0.029834
P02790	Hemopexin	HPX	32	32	68.4	51.676	0.415106	0.0299559
Q14118	Dystroglycan;Alpha-dystroglycan;Beta-dystroglycan	DAG1	16	16	23.7	97.44	1.12934	0.0344113
P01008	Antithrombin-III	SERPINC1	25	25	51.9	52.602	0.588969	0.0355261
Q02246	Contactin-2	CNTN2	40	40	51.6	113.39	0.926355	0.0362409
P06396	Gelsolin	GSN	51	51	65.6	85.696	1.09126	0.0364559
P40925	Malate dehydrogenase, cytoplasmic	MDH1	8	8	29.3	36.426	1.48803	0.0386026
Q86UX2	Inter-alpha-trypsin inhibitor heavy chain H5	ITIH5	19	19	25.1	104.58	0.856385	0.0387821
P05155	Plasma protease C1 inhibitor	SERPING1	16	16	28.6	55.154	0.506887	0.0481962

## Sheet: B_Male
Majority protein IDs	Protein names	Gene names	Peptides	Unique peptides	Sequence coverage [%]	Mol. weight [kDa]	Ratio of Male Preclinical AD/Healthy control	P-value
O15240	Neurosecretory protein VGF;Neuroendocrine regulatory peptide-1;Neuroendocrine regulatory peptide-2;Antimicrobial peptide VGF[554-577]	VGF	34	34	58.2	67.257	0.637248	3.70588e-06
P01034	Cystatin-C	CST3	12	12	63.7	15.799	0.664255	1.00202e-05
P22352	Glutathione peroxidase 3	GPX3	5	5	29.2	25.552	1.60381	1.15026e-05
P14618	Pyruvate kinase PKM	PKM	22	22	56.7	57.936	0.710254	1.25998e-05
P10451	Osteopontin	SPP1	17	17	58	35.422	0.713098	1.31192e-05
Q9UHG2	ProSAAS;KEP;Big SAAS;Little SAAS;Big PEN-LEN;PEN;Little LEN;Big LEN	PCSK1N	11	11	65.4	27.372	0.670165	1.37812e-05
P08123	Collagen alpha-2(I) chain	COL1A2	13	13	12.7	129.31	1.36896	1.92741e-05
Q13822	Ectonucleotide pyrophosphatase/phosphodiesterase family member 2	ENPP2	46	46	56.9	98.993	1.46872	2.0229e-05
Q7Z3B1	Neuronal growth regulator 1	NEGR1	15	15	47.5	38.719	1.32504	2.52452e-05
P13521	Secretogranin-2;Secretoneurin;Manserin	SCG2	23	23	44.1	70.94	0.767834	3.16945e-05
Q96GW7	Brevican core protein	BCAN	28	28	46.2	99.117	0.761048	5.04576e-05
P02751	Fibronectin;Anastellin;Ugl-Y1;Ugl-Y2;Ugl-Y3	FN1	33	33	21.1	262.62	1.36722	8.53416e-05
Q9ULB1	Neurexin-1	NRXN1	38	26	37.4	161.88	0.807325	8.66643e-05
P00746	Complement factor D	CFD	7	7	47.8	27.033	1.79377	0.000112216
P02766	Transthyretin	TTR	16	16	77.6	15.887	2.44481	0.000126119
P06727	Apolipoprotein A-IV	APOA4	43	41	73	45.398	1.29954	0.000137117
Q86UN3	Reticulon-4 receptor-like 2	RTN4RL2	11	11	26.9	46.105	0.858496	0.000155591
Q8IWU5	Extracellular sulfatase Sulf-2	SULF2	2	2	2.5	100.45	0.671167	0.000169477
Q92859	Neogenin	NEO1	25	25	24.2	160.01	1.76885	0.000185894
O00391	Sulfhydryl oxidase 1	QSOX1	17	17	29.6	82.577	1.13589	0.000362923
Q9UBQ6	Exostosin-like 2;Processed exostosin-like 2	EXTL2	8	8	30.3	37.465	1.33857	0.000380278
O15394	Neural cell adhesion molecule 2	NCAM2	24	24	34.2	93.045	2.1632	0.00068416
Q16270	Insulin-like growth factor-binding protein 7	IGFBP7	17	17	53.9	29.13	1.63623	0.000820852
Q8WXD2	Secretogranin-3	SCG3	37	37	67.5	53.005	0.746061	0.000977703
Q8NFZ8	Cell adhesion molecule 4	CADM4	10	10	40.2	42.785	1.59054	0.000986711
P08294	Extracellular superoxide dismutase [Cu-Zn]	SOD3	11	11	44.2	25.851	1.91232	0.00101158
Q9BQT9	Calsyntenin-3	CLSTN3	10	10	14	106.1	0.724252	0.00113092
Q9Y646	Carboxypeptidase Q	CPQ	10	10	31.4	51.887	1.57118	0.00115816
P23515	Oligodendrocyte-myelin glycoprotein	OMG	12	12	24.1	49.607	0.873223	0.00118386
Q9P121	Neurotrimin	NTM	16	13	48.8	37.971	1.37408	0.00120778
Q9NTU7	Cerebellin-4	CBLN4	2	2	12.9	21.808	0.685564	0.00126739
Q92823	Neuronal cell adhesion molecule	NRCAM	41	41	42.3	143.89	1.26172	0.0012875
Q86UX2	Inter-alpha-trypsin inhibitor heavy chain H5	ITIH5	19	19	25.1	104.58	1.43327	0.00146726
Q9NQ79	Cartilage acidic protein 1	CRTAC1	29	29	52.2	71.42	0.851164	0.00170803
P10645	Chromogranin-A;Vasostatin-1;Vasostatin-2;EA-92;ES-43;Pancreastatin;SS-18;WA-8;WE-14;LF-19;Catestatin;AL-11;GV-19;GR-44;ER-37;GE-25;Serpinin-RRG;Serpinin;p-Glu serpinin precursor	CHGA	26	26	58.6	50.688	0.756264	0.00171602
P55290	Cadherin-13	CDH13	11	11	22.4	78.286	0.753218	0.00173204
Q6UXB8	Peptidase inhibitor 16	PI16	9	9	24.6	49.471	1.55347	0.00214212
Q13740	CD166 antigen	ALCAM	21	21	43.9	65.102	1.61749	0.00285287
P07360	Complement component C8 gamma chain	C8G	9	9	51	22.277	1.33981	0.00362019
Q8TEU8	WAP, Kazal, immunoglobulin, Kunitz and NTR domain-containing protein 2	WFIKKN2	17	17	42.5	63.941	1.28095	0.00363612
Q92932	Receptor-type tyrosine-protein phosphatase N2	PTPRN2	9	9	14.4	111.27	0.719093	0.00402183
Q96S96	Phosphatidylethanolamine-binding protein 4	PEBP4	10	10	51.5	25.733	0.769146	0.00435122
O95502	Neuronal pentraxin receptor	NPTXR	17	17	48.4	52.846	0.693294	0.00481337
Q15904	V-type proton ATPase subunit S1	ATP6AP1	7	7	18.5	52.025	0.654103	0.00486991
P09871	Complement C1s subcomponent;Complement C1s subcomponent heavy chain;Complement C1s subcomponent light chain	C1S	34	34	55.7	76.684	1.11257	0.00507636
Q15818	Neuronal pentraxin-1	NPTX1	14	13	36.1	47.122	0.834963	0.00548296
Q13449	Limbic system-associated membrane protein	LSAMP	14	14	41.4	37.393	1.11321	0.00554633
O94919	Endonuclease domain-containing 1 protein	ENDOD1	10	10	23.4	55.016	1.69081	0.0055505
Q6UXD5	Seizure 6-like protein 2	SEZ6L2	13	13	22.9	97.559	0.826825	0.00671115
P04004	Vitronectin;Vitronectin V65 subunit;Vitronectin V10 subunit;Somatomedin-B	VTN	16	16	36	54.305	1.25659	0.00698075
P18065	Insulin-like growth factor-binding protein 2	IGFBP2	14	14	60.3	34.814	0.871878	0.00845468
Q08380	Galectin-3-binding protein	LGALS3BP	15	15	34.5	65.33	1.29453	0.00873691
P78324;Q5TFQ8	Tyrosine-protein phosphatase non-receptor type substrate 1;Signal-regulatory protein beta-1 isoform 3	SIRPA;SIRPB1	17	17	42.5	54.966	3.61266	0.00882147
P19823	Inter-alpha-trypsin inhibitor heavy chain H2	ITIH2	25	25	36.4	106.46	1.52322	0.00884196
P36955	Pigment epithelium-derived factor	SERPINF1	25	25	65.8	46.312	2.92793	0.0101252
Q969P0	Immunoglobulin superfamily member 8	IGSF8	9	9	16.8	65.033	0.831433	0.0109884
P13591	Neural cell adhesion molecule 1	NCAM1	31	31	41.5	94.573	1.22763	0.0114125
Q96KG7	Multiple epidermal growth factor-like domains protein 10	MEGF10	20	20	25.3	122.2	0.756716	0.013304
P08603	Complement factor H	CFH	64	60	62.6	139.09	1.25818	0.0133519
Q9UBP4	Dickkopf-related protein 3	DKK3	19	19	60.9	38.39	0.863594	0.013509
O00584	Ribonuclease T2	RNASET2	11	11	50.8	29.48	1.16373	0.013518
P02765	Alpha-2-HS-glycoprotein;Alpha-2-HS-glycoprotein chain A;Alpha-2-HS-glycoprotein chain B	AHSG	7	7	33	39.324	2.03774	0.0141355
P29622	Kallistatin	SERPINA4	21	21	53.9	48.541	2.65363	0.0178219
P01011	Alpha-1-antichymotrypsin;Alpha-1-antichymotrypsin His-Pro-less	SERPINA3	23	23	52	47.65	3.25534	0.0181832
O00533	Neural cell adhesion molecule L1-like protein;Processed neural cell adhesion molecule L1-like protein	CHL1	50	50	43.3	135.07	1.1853	0.0182719
O94856	Neurofascin	NFASC	37	37	34.5	150.02	1.09425	0.0196688
P51693	Amyloid-like protein 1;C30	APLP1	27	27	39.8	72.176	0.867655	0.0213431
Q96PD5	N-acetylmuramoyl-L-alanine amidase	PGLYRP2	20	20	47.9	62.216	1.3874	0.0222913
P09417	Dihydropteridine reductase	QDPR	10	10	55.3	25.789	1.22472	0.022946
P12259	Coagulation factor V;Coagulation factor V heavy chain;Coagulation factor V light chain	F5	38	30	25.4	251.7	1.63099	0.0231815
Q86Y38	Xylosyltransferase 1	XYLT1	2	2	2	107.57	0.701374	0.0237253
P02746	Complement C1q subcomponent subunit B	C1QB	7	7	34.4	26.721	1.12568	0.0237803
P01033	Metalloproteinase inhibitor 1	TIMP1	8	8	55.6	23.171	1.24606	0.0244773
P05452	Tetranectin	CLEC3B	15	11	70.3	22.537	1.20441	0.0252258
O14498	Immunoglobulin superfamily containing leucine-rich repeat protein	ISLR	7	7	23.4	45.997	1.16598	0.0262914
P19022	Cadherin-2	CDH2	18	18	22.8	99.808	0.843952	0.0271656
P10909	Clusterin;Clusterin beta chain;Clusterin alpha chain	CLU	24	24	41.2	52.494	0.793155	0.0285142
Q24JP5	Transmembrane protein 132A	TMEM132A	20	20	26.2	110.11	0.80098	0.0289333
P23142	Fibulin-1	FBLN1	21	21	36.8	77.213	1.53678	0.0295023
P54289	Voltage-dependent calcium channel subunit alpha-2/delta-1;Voltage-dependent calcium channel subunit alpha-2-1;Voltage-dependent calcium channel subunit delta-1	CACNA2D1	45	44	46.6	124.57	0.90131	0.0299535
P02452	Collagen alpha-1(I) chain	COL1A1	26	26	23.2	138.94	1.24523	0.030162
P0DP58	Ly-6/neurotoxin-like protein 1	LYNX1	2	2	19.8	12.641	0.872534	0.0305199
P61916	Epididymal secretory protein E1	NPC2	12	12	58.9	16.57	0.771405	0.0309831
Q14515	SPARC-like protein 1	SPARCL1	41	41	65.2	75.207	1.12176	0.0316165
Q8NFT8	Delta and Notch-like epidermal growth factor-related receptor	DNER	5	5	9.9	78.474	0.835404	0.0320889
P00747	Plasminogen;Plasmin heavy chain A;Activation peptide;Angiostatin;Plasmin heavy chain A, short form;Plasmin light chain B	PLG	50	50	74.8	90.568	1.33968	0.0322636
P04075	Fructose-bisphosphate aldolase A	ALDOA	14	12	53.3	39.42	0.853424	0.0332317
P13671	Complement component C6	C6	31	31	44.6	104.79	1.33692	0.0335453
P07357	Complement component C8 alpha chain	C8A	16	16	42.1	65.163	1.25975	0.0345217
P05546	Heparin cofactor 2	SERPIND1	15	15	35.7	57.07	1.23404	0.0380719
Q8WZA1	Protein O-linked-mannose beta-1,2-N-acetylglucosaminyltransferase 1	POMGNT1	18	18	37.1	75.251	0.860783	0.0389097
Q8N3J6	Cell adhesion molecule 2	CADM2	9	9	30.6	47.553	0.88475	0.040674
P04196	Histidine-rich glycoprotein	HRG	21	21	41.7	59.578	1.8749	0.0425151
Q08174	Protocadherin-1	PCDH1	8	8	11.5	114.74	0.851968	0.0425786
O94910	Latrophilin-1	LPHN1	15	15	13.8	162.71	0.879956	0.0429916
O14773	Tripeptidyl-peptidase 1	TPP1	15	15	47.1	61.247	1.38123	0.0463312
P05155	Plasma protease C1 inhibitor	SERPING1	16	16	28.6	55.154	1.58075	0.0476967
P07998	Ribonuclease pancreatic	RNASE1	5	5	59	17.644	1.4446	0.0477983
